# Supplementary material
Source: Springer Nature journal article supplement (https://www.springermedizin.de/resource/supplementary/12936_2010_1686_MOESM4_ESM.pdf/9542380)

January

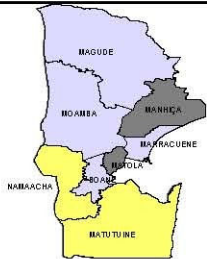

Proportion of Cases

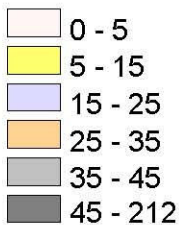

February

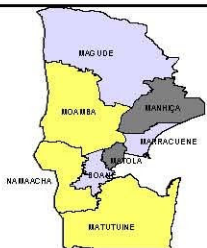

May

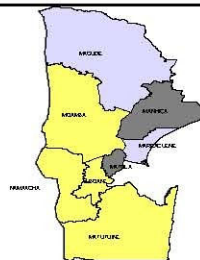

March

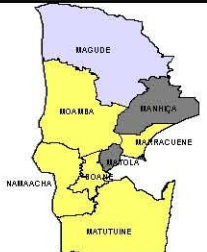

June

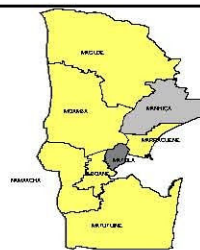

April

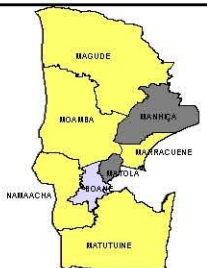

Supplement: MOESM4 [file 9542380]
